# Supplementary material
Source: ML conference proceedings conference paper supplement (https://openaccess.thecvf.com/content/CVPR2026/html/Chen_Coverage_Optimization_for_CVPR_2026_paper.html)
Supplement: Supplementary file 1 [file Chen_Coverage_Optimization_for_CVPR_2026_supplemental.pdf]

## A. Proofs

The RHS (10) is simply a linear objective of the form  $\sum_i \alpha_i w_i$ . The constraint set  $w \in \mathbb{S}_+^{P-1}$  implies that  $\|w\|_1 \geq 1$  and consequently,  $\sum_i w_i \geq 1$ . Therefore, the following inequalities hold

$$\sum_i \alpha_i w_i \geq (\min_i \alpha_i) \sum_i w_i \geq \min_i \alpha_i, \quad (26)$$

with equality when  $a = e_{i^*}$ , the one-hot vector corresponding to  $i^* = \arg \min_i \alpha_i$ . Any mixture is necessarily bigger by triangle inequality and because the problem is convex,  $e_{i^*}$  is a *unique* minimizer corresponding to the column of  $W^{(K)}$  with the *smallest* norm.

The LHS (10) is identical to a quadratic objective, which we show has the same minimizer. Due to the non-negativity of  $W$ , dot products between columns of  $W$  must be non-negative. Subsequent inequalities follow

$$\begin{aligned} w^T G w &= \sum_i w_i^2 \|W_{:,i}\|_2^2 + 2 \sum_{i < j} w_i w_j W_{:,i}^T W_{:,j} \\ &\geq \sum_i w_i^2 \|W_{:,i}\|_2^2 \\ &\geq (\min_i \|W_{:,i}\|_2) \sum_i w_i^2 = \min_i \|W_{:,i}\|_2, \end{aligned} \quad (27)$$

with equality when  $a = e_{i^*}$ , where  $i^* = \arg \min_i \|W_{:,i}\|_2$  corresponds to the *smallest* norm column. With the one-hot vector, the cross terms  $w_i w_j$  are 0 if  $i \neq j$ , and the latter inequalities follow automatically. As a result, the *unique* minimizer of the LHS of Eq. (10) is also a minimizer of the RHS (10).

## B. Additional Results

We observe that most methods display a logarithmic-shaped curve for image-based metrics over time. Based on this observation, we find that comparing methods very early or very late in training was not very informative. Too early and the methods have not had sufficient time to accumulate errors; too late and the methods will have chosen many of the same views, leading to similar reconstruction quality. In addition, neither are common situations, as the view selection seeks to retrieve the highest fidelity scene representation as efficiently as possible.

Therefore, we quantitatively compare all methods by showing image-based metrics at 10K (Tabs. 3 to 5) and 30K (Tabs. 6 to 8) gradient steps. In addition, we report an Area-Under-Curve (AUC) metric (normalized by the number of gradient steps), the integrated difference between a method and random over time. We denote this metric with a  $\Delta$ . The AUC metric indicates the time-averaged improvement of the method over random. We observe that CONVERGE consistently outperforms the competing methods regardless of the sweep over time.

Table 3. Image metrics across several view selection metrics for the Tanks and Temples dataset after 10K gradient steps. Two scenes are visualized, while averages are computed across the entire dataset.

| Scene    | Method                 | PSNR $\uparrow$ | $\Delta$ PSNR | SSIM $\uparrow$ | $\Delta$ SSIM | LPIPS $\downarrow$ | $\Delta$ LPIPS |
|----------|------------------------|-----------------|---------------|-----------------|---------------|--------------------|----------------|
| Ignatius | Bayes' Rays            | 16.71           | -0.24         | 0.43            | -0.12         | 0.56               | 0.24           |
|          | FisherRF               | 18.01           | -0.56         | 0.59            | -0.03         | 0.31               | 0.02           |
|          | Random                 | 18.45           | -             | 0.64            | -             | 0.28               | -              |
|          | <b>CONVERGE (Ours)</b> | <b>19.40</b>    | <b>0.45</b>   | <b>0.67</b>     | <b>0.01</b>   | <b>0.27</b>        | <b>-0.01</b>   |
| Train    | Bayes' Rays            | 12.70           | -1.85         | 0.45            | -0.07         | 0.73               | 0.28           |
|          | FisherRF               | 15.03           | -0.77         | 0.57            | -0.04         | 0.39               | 0.04           |
|          | Random                 | 16.37           | -             | 0.64            | -             | 0.32               | -              |
|          | <b>CONVERGE (Ours)</b> | <b>17.00</b>    | <b>0.65</b>   | <b>0.66</b>     | <b>0.02</b>   | <b>0.30</b>        | <b>-0.02</b>   |
| Overall  | Bayes' Rays            | 14.46           | -1.86         | 0.42            | -0.13         | 0.67               | 0.29           |
|          | FisherRF               | 16.25           | -1.36         | 0.57            | -0.05         | 0.36               | 0.05           |
|          | Random                 | 18.00           | -             | 0.65            | -             | 0.29               | -              |
|          | <b>CONVERGE (Ours)</b> | <b>18.34</b>    | <b>0.28</b>   | <b>0.66</b>     | <b>0.01</b>   | <b>0.28</b>        | <b>-0.01</b>   |

Table 4. Image metrics across several view selection metrics for the custom dataset after 10K gradient steps. Two scenes are visualized, while averages are computed across the entire dataset.

| Scene   | Method                 | PSNR $\uparrow$ | $\Delta$ PSNR | SSIM $\uparrow$ | $\Delta$ SSIM | LPIPS $\downarrow$ | $\Delta$ LPIPS |
|---------|------------------------|-----------------|---------------|-----------------|---------------|--------------------|----------------|
| Shiny   | Bayes' Rays            | 13.08           | -1.43         | 0.31            | -0.09         | 0.88               | 0.29           |
|         | FisherRF               | 13.69           | -1.35         | 0.38            | -0.05         | 0.58               | 0.07           |
|         | Random                 | 15.47           | -             | 0.46            | -             | 0.47               | -              |
|         | <b>CONVERGE (Ours)</b> | <b>16.49</b>    | <b>0.76</b>   | <b>0.49</b>     | <b>0.02</b>   | <b>0.43</b>        | <b>-0.03</b>   |
| Space   | Bayes' Rays            | 11.70           | -1.74         | 0.20            | -0.13         | 0.85               | 0.34           |
|         | FisherRF               | 13.94           | -0.55         | 0.39            | -0.03         | 0.46               | 0.03           |
|         | Random                 | 14.88           | -             | 0.45            | -             | 0.41               | -              |
|         | <b>CONVERGE (Ours)</b> | <b>15.66</b>    | <b>0.78</b>   | <b>0.48</b>     | <b>0.03</b>   | <b>0.36</b>        | <b>-0.03</b>   |
| Overall | Bayes' Rays            | 13.20           | -1.62         | 0.27            | -0.09         | 0.84               | 0.35           |
|         | FisherRF               | 14.58           | -1.02         | 0.38            | -0.05         | 0.48               | 0.06           |
|         | Random                 | 16.11           | -             | 0.46            | -             | 0.38               | -              |
|         | <b>CONVERGE (Ours)</b> | <b>16.94</b>    | <b>0.68</b>   | <b>0.50</b>     | <b>0.02</b>   | <b>0.35</b>        | <b>-0.03</b>   |

Table 5. Image metrics across several view selection metrics for the MipNeRF360 dataset after 10K gradient steps. Two scenes are visualized, while averages are computed across the entire dataset.

| Scene   | Method                 | PSNR $\uparrow$ | $\Delta$ PSNR | SSIM $\uparrow$ | $\Delta$ SSIM | LPIPS $\downarrow$ | $\Delta$ LPIPS |
|---------|------------------------|-----------------|---------------|-----------------|---------------|--------------------|----------------|
| Counter | Bayes' Rays            | 19.74           | -2.51         | 0.61            | -0.15         | 0.55               | 0.30           |
|         | FisherRF               | 22.22           | -1.66         | 0.79            | -0.04         | 0.25               | 0.04           |
|         | Random                 | 24.06           | -             | 0.83            | -             | 0.22               | -              |
|         | <b>CONVERGE (Ours)</b> | <b>25.24</b>    | <b>0.71</b>   | <b>0.86</b>     | <b>0.02</b>   | <b>0.18</b>        | <b>-0.02</b>   |
| Garden  | Bayes' Rays            | 17.62           | -5.32         | 0.31            | -0.31         | 0.77               | 0.51           |
|         | FisherRF               | 23.73           | -0.95         | 0.72            | -0.04         | 0.21               | 0.03           |
|         | Random                 | 25.61           | -             | 0.79            | -             | 0.15               | -              |
|         | <b>CONVERGE (Ours)</b> | <b>26.34</b>    | <b>0.46</b>   | <b>0.81</b>     | <b>0.01</b>   | <b>0.15</b>        | <b>-0.01</b>   |
| Overall | Bayes' Rays            | 18.07           | -2.94         | 0.44            | -0.17         | 0.68               | 0.35           |
|         | FisherRF               | 20.99           | -1.40         | 0.67            | -0.04         | 0.29               | 0.05           |
|         | Random                 | 22.89           | -             | 0.72            | -             | 0.23               | -              |
|         | <b>CONVERGE (Ours)</b> | <b>23.36</b>    | <b>0.29</b>   | <b>0.72</b>     | <b>0.00</b>   | <b>0.22</b>        | <b>-0.01</b>   |

## C. Optimization in Continuous Space and Transmittance-based Metrics

Additionally, we investigate the viability of transmittance-based view metrics and the use of CONVERGE in a continuous space optimization scheme. To test, we compare Equation (17) and CONVERGE against an extension (Gradient), which initializes around the best neighbor (root) and then performs 50 gradient descent steps into the camera pose to minimize coverage, showcasing free-view selection

Table 6. Image metrics across several view selection metrics for the Tanks and Temples dataset after 30K gradient steps. Two scenes are visualized, while averages are computed across the entire dataset.

| Scene    | Method                 | PSNR $\uparrow$ | $\Delta$ PSNR | SSIM $\uparrow$ | $\Delta$ SSIM | LPIPS $\downarrow$ | $\Delta$ LPIPS |
|----------|------------------------|-----------------|---------------|-----------------|---------------|--------------------|----------------|
| Ignatius | Bayes' Rays            | 17.10           | -2.06         | 0.46            | -0.20         | 0.45               | 0.25           |
|          | FisherRF               | 20.95           | -0.28         | 0.71            | -0.03         | 0.22               | 0.02           |
|          | Random                 | 20.89           | -             | 0.72            | -             | 0.21               | -              |
|          | <b>CONVERGE (Ours)</b> | <b>21.53</b>    | <b>0.68</b>   | <b>0.73</b>     | <b>0.02</b>   | <b>0.20</b>        | <b>-0.01</b>   |
| Train    | Bayes' Rays            | 13.04           | -4.21         | 0.46            | -0.20         | 0.70               | 0.41           |
|          | FisherRF               | 18.93           | -1.34         | 0.72            | -0.06         | 0.25               | 0.07           |
|          | Random                 | 19.97           | -             | 0.76            | -             | 0.19               | -              |
|          | <b>CONVERGE (Ours)</b> | <b>20.30</b>    | <b>0.60</b>   | <b>0.77</b>     | <b>0.01</b>   | <b>0.18</b>        | <b>-0.02</b>   |
| Overall  | Bayes' Rays            | 15.03           | -3.91         | 0.43            | -0.23         | 0.62               | 0.37           |
|          | FisherRF               | 20.26           | -1.32         | 0.71            | -0.06         | 0.23               | 0.05           |
|          | Random                 | 21.12           | -             | 0.75            | -             | 0.20               | -              |
|          | <b>CONVERGE (Ours)</b> | <b>21.52</b>    | <b>0.41</b>   | <b>0.76</b>     | <b>0.01</b>   | <b>0.19</b>        | <b>-0.01</b>   |

Table 7. Image metrics across several view selection metrics for the custom dataset after 30K gradient steps. Two scenes are visualized, while averages are computed across the entire dataset.

| Scene   | Method                 | PSNR $\uparrow$ | $\Delta$ PSNR | SSIM $\uparrow$ | $\Delta$ SSIM | LPIPS $\downarrow$ | $\Delta$ LPIPS |
|---------|------------------------|-----------------|---------------|-----------------|---------------|--------------------|----------------|
| Shiny   | Bayes' Rays            | 13.38           | -3.08         | 0.30            | -0.17         | 0.86               | 0.42           |
|         | FisherRF               | 16.97           | -1.59         | 0.52            | -0.06         | 0.41               | 0.09           |
|         | Random                 | 18.27           | -             | 0.56            | -             | 0.33               | -              |
|         | <b>CONVERGE (Ours)</b> | <b>18.41</b>    | <b>0.59</b>   | <b>0.58</b>     | <b>0.02</b>   | <b>0.31</b>        | <b>-0.03</b>   |
| Space   | Bayes' Rays            | 11.76           | -3.85         | 0.19            | -0.27         | 0.83               | 0.46           |
|         | FisherRF               | 18.16           | -0.28         | 0.58            | -0.02         | 0.29               | 0.03           |
|         | Random                 | 17.85           | -             | 0.58            | -             | 0.27               | -              |
|         | <b>CONVERGE (Ours)</b> | <b>18.24</b>    | <b>0.69</b>   | <b>0.59</b>     | <b>0.02</b>   | <b>0.25</b>        | <b>-0.03</b>   |
| Overall | Bayes' Rays            | 13.40           | -3.42         | 0.27            | -0.21         | 0.82               | 0.46           |
|         | FisherRF               | 17.94           | -1.14         | 0.54            | -0.06         | 0.33               | 0.08           |
|         | Random                 | 18.71           | -             | 0.58            | -             | 0.27               | -              |
|         | <b>CONVERGE (Ours)</b> | <b>19.05</b>    | <b>0.60</b>   | <b>0.60</b>     | <b>0.02</b>   | <b>0.25</b>        | <b>-0.02</b>   |

Table 8. Image metrics across several view selection metrics for the MipNeRF360 dataset after 30K gradient steps. Two scenes are visualized, while averages are computed across the entire dataset.

| Scene   | Method                 | PSNR $\uparrow$ | $\Delta$ PSNR | SSIM $\uparrow$ | $\Delta$ SSIM | LPIPS $\downarrow$ | $\Delta$ LPIPS |
|---------|------------------------|-----------------|---------------|-----------------|---------------|--------------------|----------------|
| Counter | Bayes' Rays            | 20.39           | -4.90         | 0.62            | -0.22         | 0.48               | 0.32           |
|         | FisherRF               | 26.35           | -1.73         | 0.87            | -0.04         | 0.17               | 0.04           |
|         | Random                 | 27.51           | -             | 0.89            | -             | 0.15               | -              |
|         | <b>CONVERGE (Ours)</b> | <b>27.96</b>    | <b>0.79</b>   | <b>0.90</b>     | <b>0.02</b>   | <b>0.14</b>        | <b>-0.02</b>   |
| Garden  | Bayes' Rays            | 19.28           | -7.33         | 0.33            | -0.44         | 0.75               | 0.59           |
|         | FisherRF               | 27.77           | -1.01         | 0.85            | -0.04         | 0.12               | 0.03           |
|         | Random                 | 27.85           | 0.00          | 0.85            | 0.00          | 0.11               | 0.00           |
|         | <b>CONVERGE (Ours)</b> | <b>28.06</b>    | <b>0.51</b>   | <b>0.86</b>     | <b>0.01</b>   | <b>0.10</b>        | <b>-0.01</b>   |
| Overall | Bayes' Rays            | 18.81           | -4.92         | 0.45            | -0.25         | 0.63               | 0.41           |
|         | FisherRF               | 24.92           | -1.35         | 0.78            | -0.03         | 0.19               | 0.04           |
|         | Random                 | 25.57           | 0.00          | 0.78            | 0.00          | 0.17               | 0.00           |
|         | <b>CONVERGE (Ours)</b> | <b>25.78</b>    | <b>0.35</b>   | <b>0.78</b>     | <b>0.00</b>   | <b>0.17</b>        | <b>-0.01</b>   |

and continuous optimization. Since our datasets are finite, we instead take renders from a trained Splatfacto model at these optimized poses and add them to the training set, in addition to the root's frame to stabilize training.

CONVERGE is superior to Equation (17), suggesting that designing the view metric to accommodate transmittance effects when they can be noisy and transient degrades optimality of the chosen viewpoint. CONVERGE outperforms Gradient because Gradient's training images are partially derived from a 3DGS rather than reality. Note that not

Table 9. Image metrics across different view-selection methods at 30K steps, averaged over all scenes.

| Setting           | Method        | PSNR $\uparrow$ | SSIM $\uparrow$ | LPIPS $\downarrow$ |
|-------------------|---------------|-----------------|-----------------|--------------------|
| Embodied + Sparse | Equation (17) | 21.95           | 0.695           | 0.251              |
|                   | Gradient      | 21.77           | 0.701           | 0.275              |
|                   | Coverage      | <b>22.39</b>    | <b>0.707</b>    | <b>0.244</b>       |

including the root frames (which came from ground-truth images) in the training set destabilizes training, which suggests that training a 3DGS using auxiliary 3DGS renders can lead to negative feedback. We believe with access to a simulator or execution on hardware, Gradient might slightly outperform CONVERGE.
